# Supplementary material for: Variation in Nutritional Components and Antioxidant Capacity of Different Cultivars and Organs of Basella alba
Source: MDPI journal article supplement (doi:10.3390/plants13060892), 2024-03-20
Supplement: s1 [file s1]

Supplemental Table S2

Correlation of the nutritional components and antioxidant capacity in *Basella alba*.

|                            | Total soluble<br>sugar | Total soluble<br>protein | Total<br>chlorophyll | Total<br>carotenoids | Total ascorbic<br>acid | Total<br>proanthocyanidin<br>s | Total<br>flavonoids | Total<br>phenolics | FRAP    | ABT<br>S |
|----------------------------|------------------------|--------------------------|----------------------|----------------------|------------------------|--------------------------------|---------------------|--------------------|---------|----------|
| Total soluble sugar        | 1                      |                          |                      |                      |                        |                                |                     |                    |         |          |
| Total soluble protein      |                        | 1                        |                      |                      |                        |                                |                     |                    |         |          |
| Total chlorophyll          |                        |                          | 1                    |                      |                        |                                |                     |                    |         |          |
| Total carotenoids          |                        |                          | 0.978512             | 1                    |                        |                                |                     |                    |         |          |
| Total ascorbic acid        |                        |                          |                      |                      | 1                      |                                |                     |                    |         |          |
| Total<br>proanthocyanidins | -0.827309              |                          |                      |                      |                        | 1                              |                     |                    |         |          |
| Total flavonoids           |                        |                          | 0.728157             | 0.709900             |                        |                                | 1                   |                    |         |          |
| Total phenolics            |                        |                          |                      |                      | 0.690737               |                                |                     | 1                  |         |          |
| FRAP                       | -0.750883              |                          |                      |                      |                        | 0.817969                       |                     |                    | 1       |          |
|                            |                        |                          |                      |                      |                        |                                |                     |                    | 0.87115 | 1        |
| ABTS                       | -0.763883              |                          |                      |                      |                        | 0.682161                       |                     | 0.771312           | 5       |          |
